# Supplementary material for: Global Characterization of XRN 5′-3′ Exoribonucleases and Their Responses to Environmental Stresses in Plants
Source: MDPI journal article supplement (doi:10.3390/d13120612), 2021-11-24
Supplement: s1 [file s1]

| RMSD | TM-score | Score   | SI% | SS% | Length |
|------|----------|---------|-----|-----|--------|
| 3.19 | 0.72     | 1738.79 | 52  | 63  | 777    |

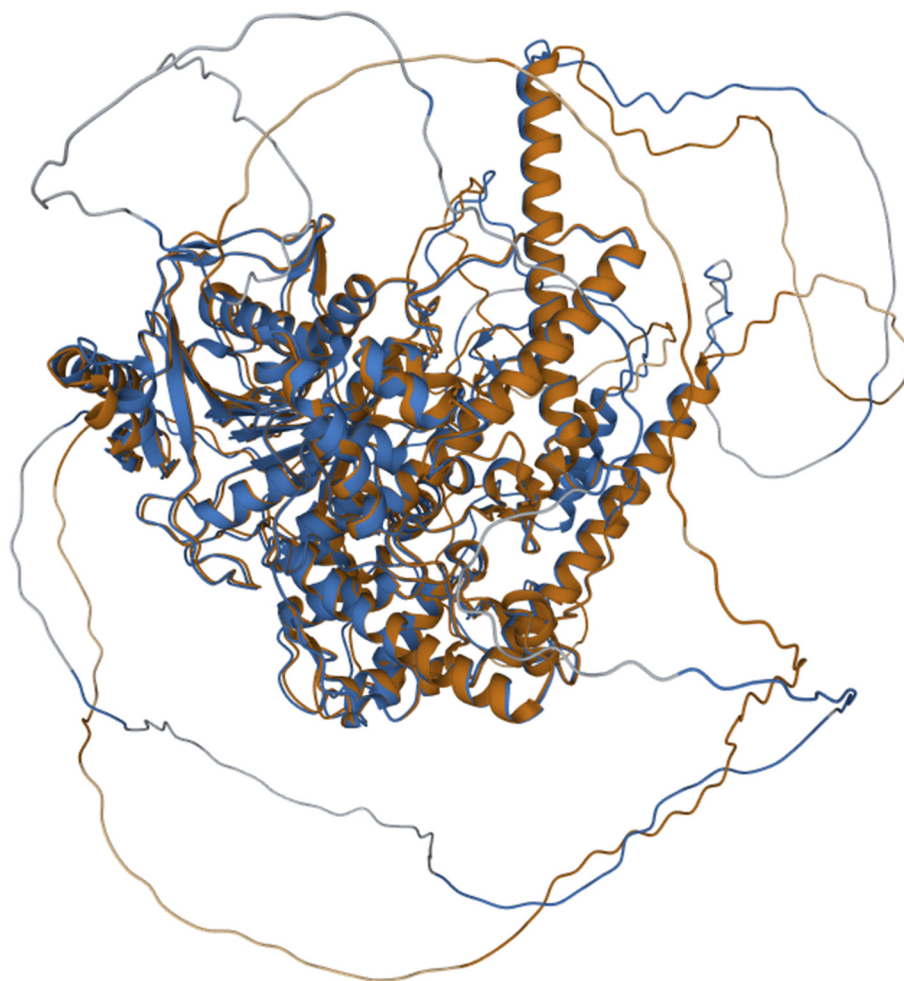

**Figure S1.** The pairwise structure alignment of two plant XRN proteins. The pairwise structure alignment of AtXRN3 (Orange) and OsXRN3 (Blue), displaying high similarity in the domains of alpha-helices and beta-sheets. The root mean square deviation (RMSD), TM-score, Score for structural similarity, sequence identity percentage (SI%), sequence similarity percentage (SS%) and the length of residue pairs structurally equivalent in the alignment were showed.

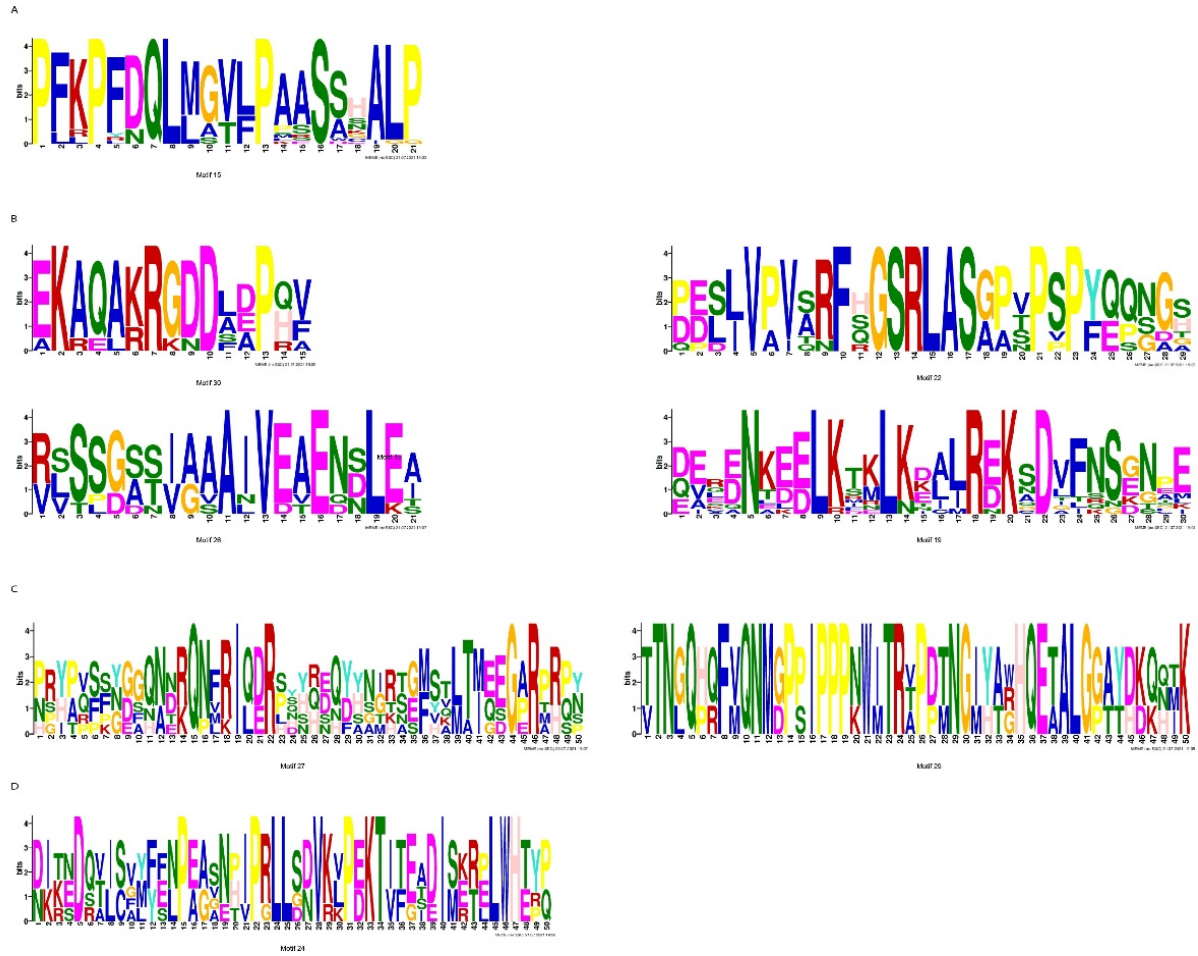

**Figure S2.** Visualization of the selected conserved motif sequences. (A) Motif 15, shared among all 23 XRNs. (B) Motifs 30, 22, 26 and 19 that were frequently lost in XRN4, XRN5 and a few of XRN3. (C) Motifs 27 and 29 specifically detected in XRN4 proteins. (D) Motif 24 specifically detected in XRN5 proteins.



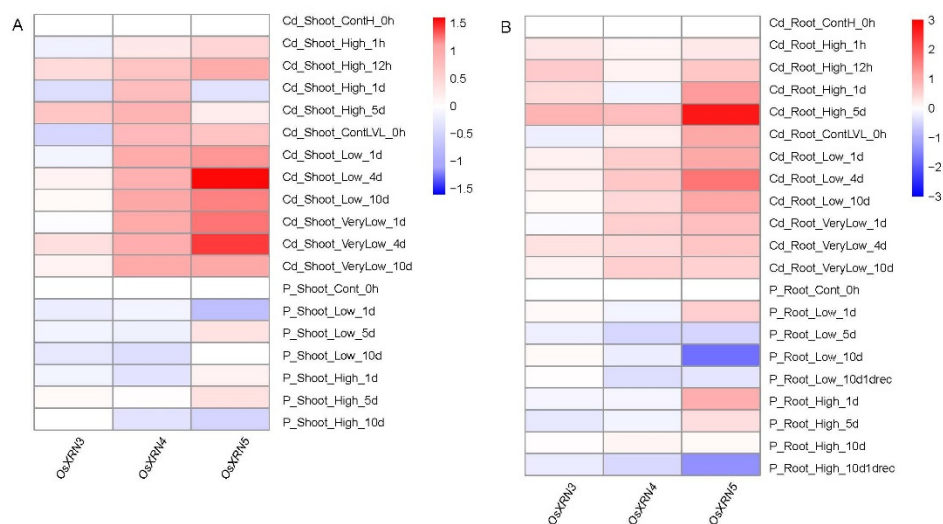

**Figure S4.** Cluster analysis of the *OsXRN*s expression pattern response to nutrition. Heat maps demonstrate the expression profiles of *OsXRN*s in response to Cd and P in rice shoot (A) and root (B).
